# Supplementary material for: Dietary 7-ketocholesterol exacerbates myocardial ischemia–reperfusion injury in mice through monocyte/macrophage-mediated inflammation
Source: PubMed Central journal article supplement (PMC9436973; doi:10.1038/s41598-022-19065-z), 2022-09-01
Supplement: 41598_2022_19065_MOESM1_ESM.pdf [file 41598_2022_19065_MOESM1_ESM.pdf]

# Supplementary Figure S1

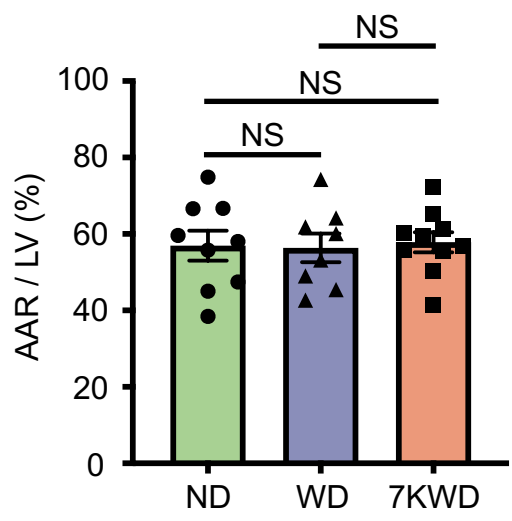

**Supplementary Figure S1. Dietary 7-KC did not increase AAR compared to LV after myocardial IR.** The AAR / LV quantified 24 hours after IR. N=8-10. The data were analyzed by one-way ANOVA, followed by Tukey's post-hoc multiple comparison test. AAR, area at risk; LV, left ventricle; ND, normal laboratory diet; WD, western diet; 7KWD, WD containing 7-KC.

# Supplementary Figure S2

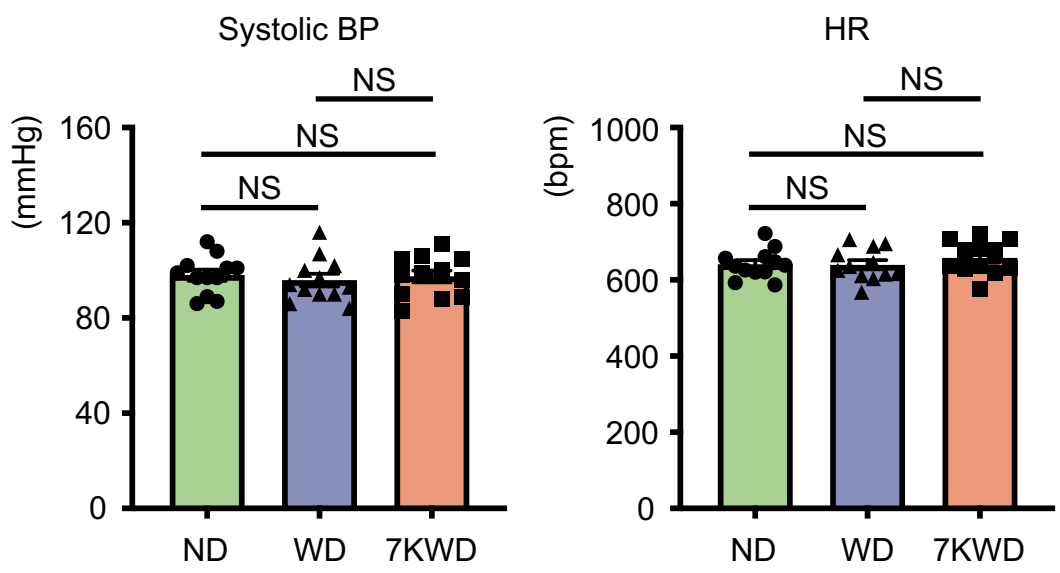

**Supplementary Figure S2. Dietary 7-KC did not affect BP or HR.** BP and HR measured in mice fed a ND, WD or 7KWD for 3 weeks. N=12. The data were analyzed by one-way ANOVA, followed by Tukey's post-hoc multiple comparison test. BP, blood pressure; HR, heart rate; ND, normal laboratory diet; WD, western diet; 7KWD, WD containing 7-KC.

# Supplementary Figure S3

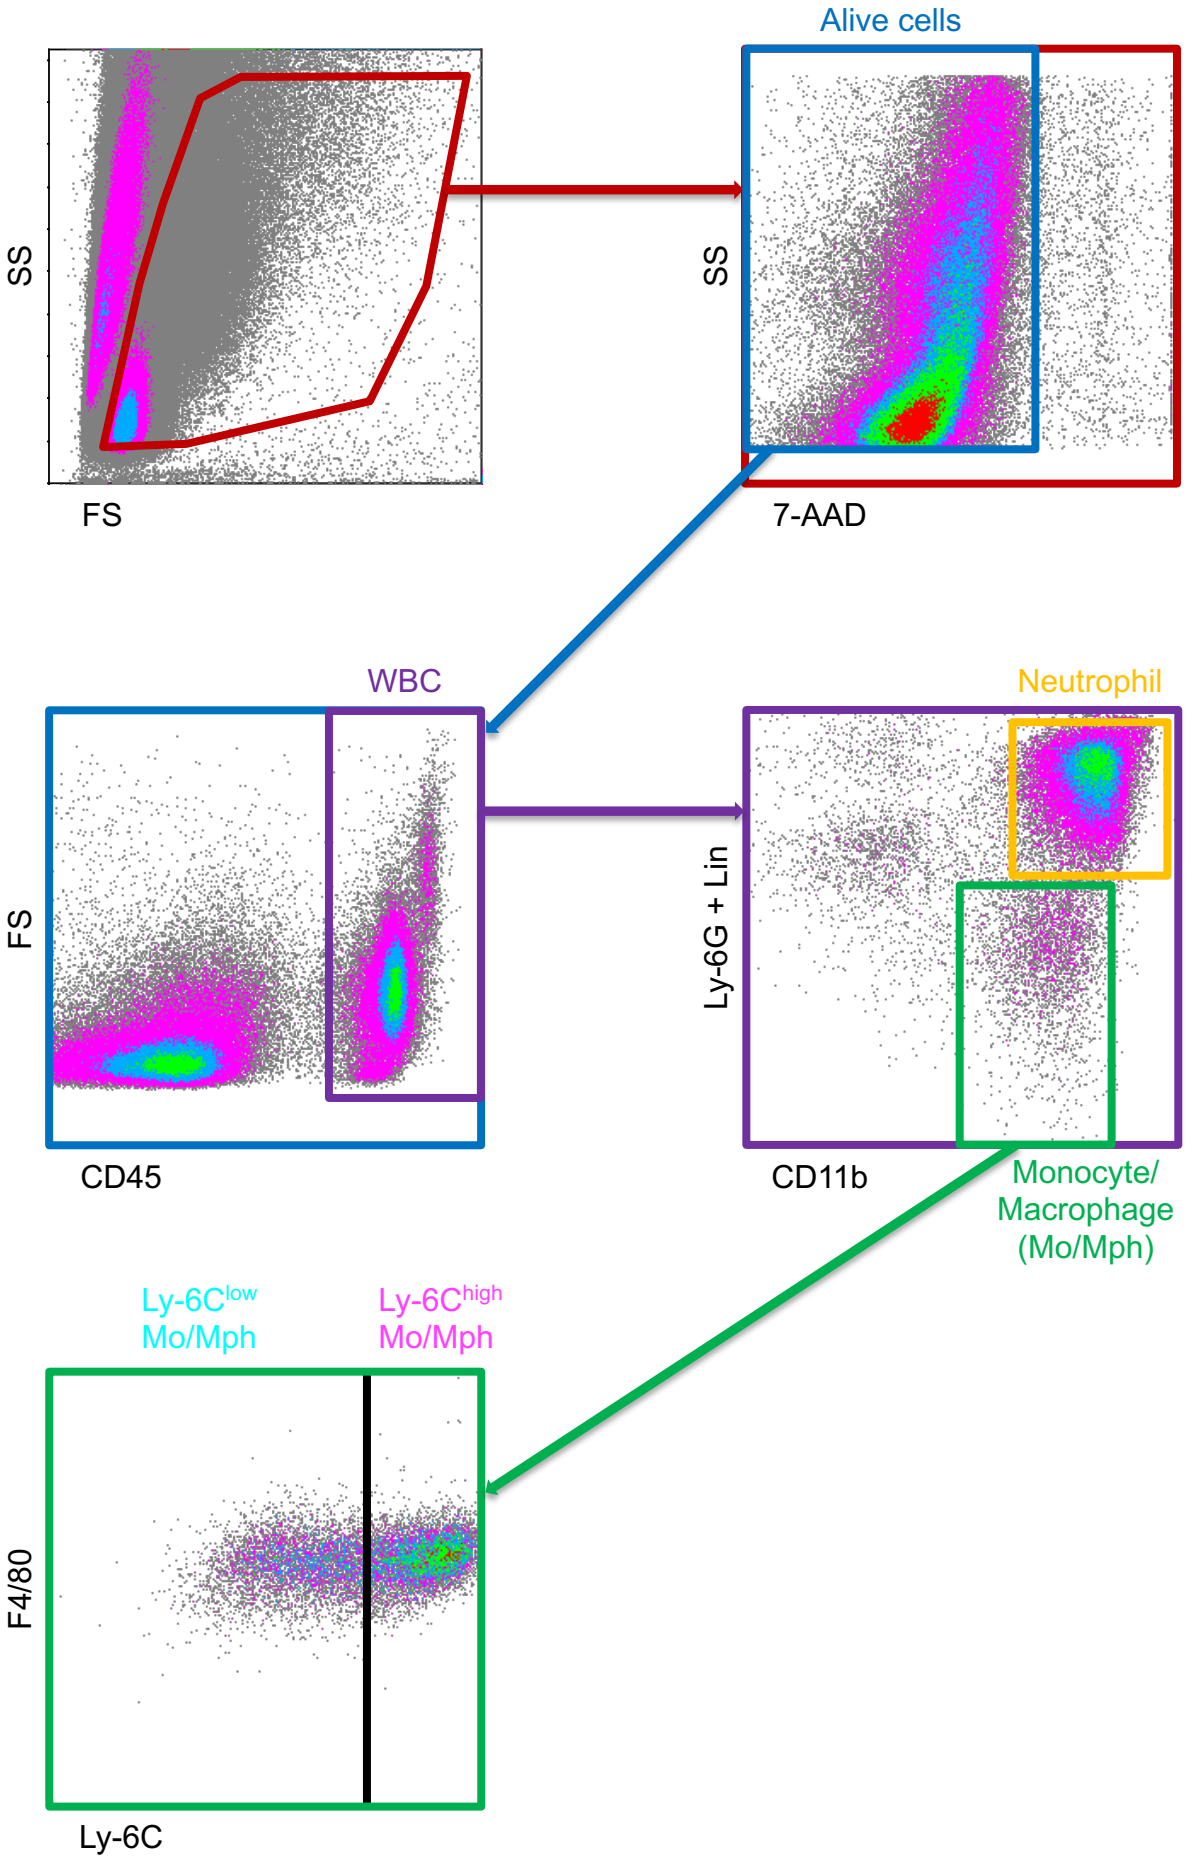

**Supplementary Figure S3. Flowcytometric gating strategy.** Flowcytometric gating strategy for isolated cells from the heart after myocardial IR. FS, forward scatter; SS, side scatter; WBC, white blood cell; Lin, Lineage; Mo, monocyte; Mph, macrophage.

# Supplementary Figure S4

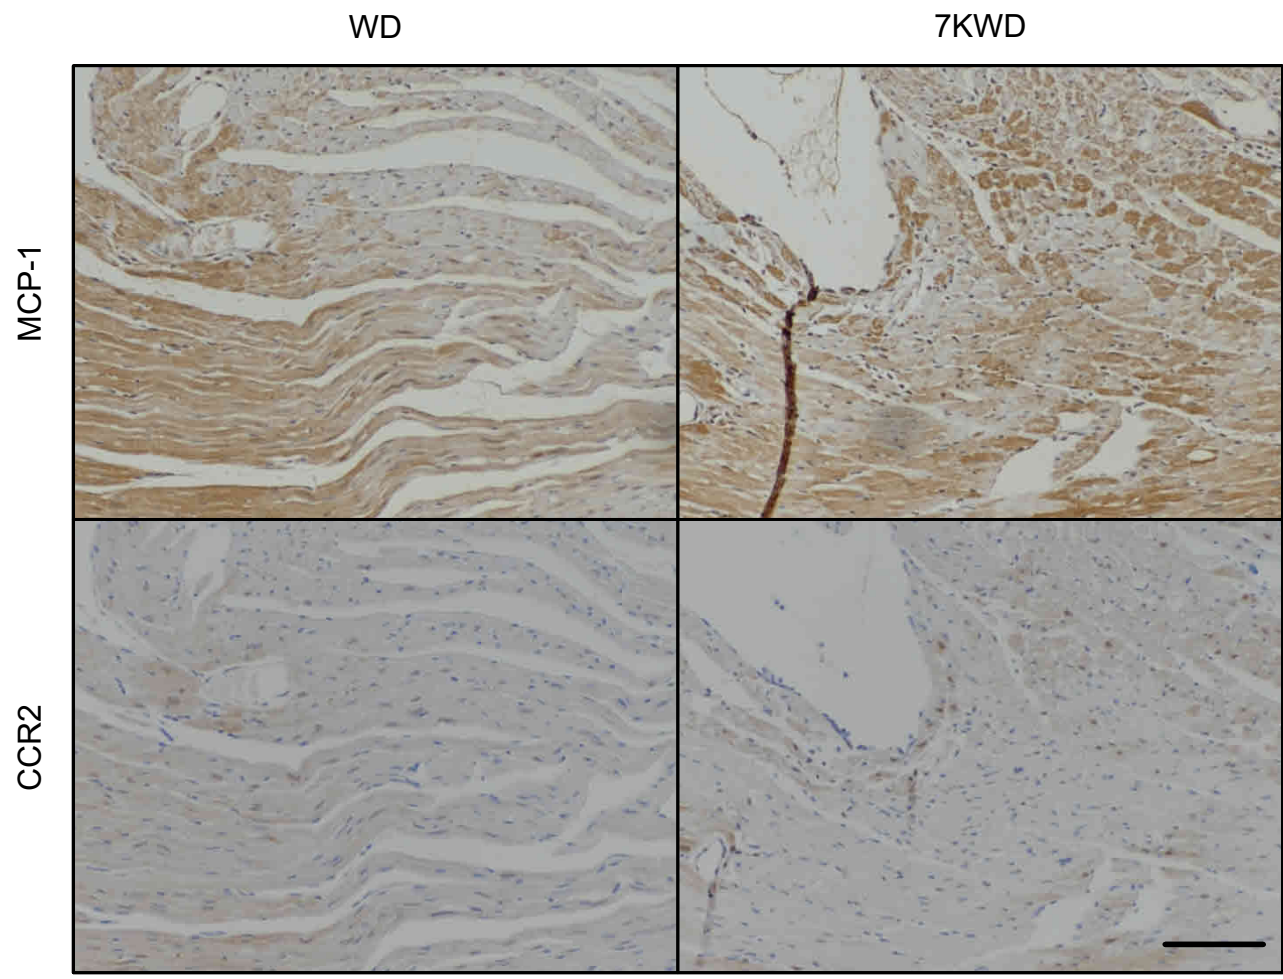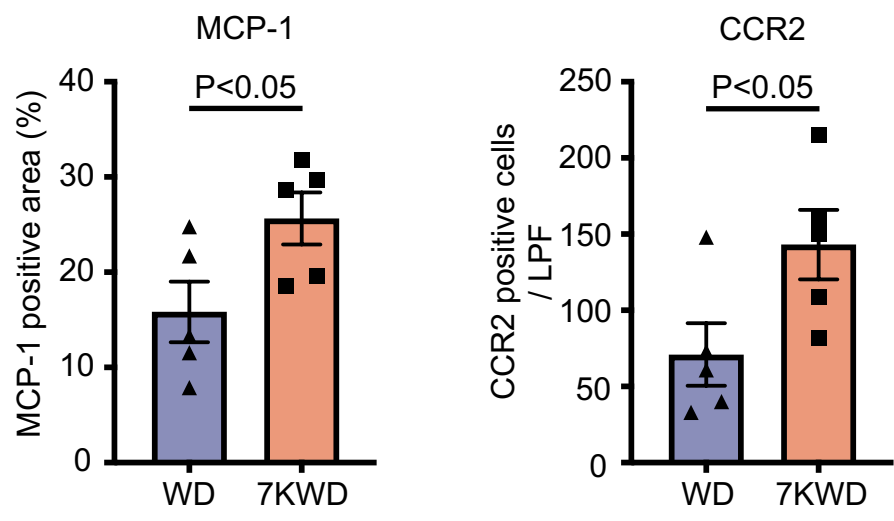

**Supplementary Figure S4. Dietary 7-KC increased MCP-1 expression and CCR2-positive cells in the heart after myocardial IR.** MCP-1 expression and CCR2-positive monocytes/macrophages in the heart at 24 hours after IR. Scale bar, 100  $\mu$ m. N=5. The data were analyzed by unpaired t test.

# Supplementary Figure S5

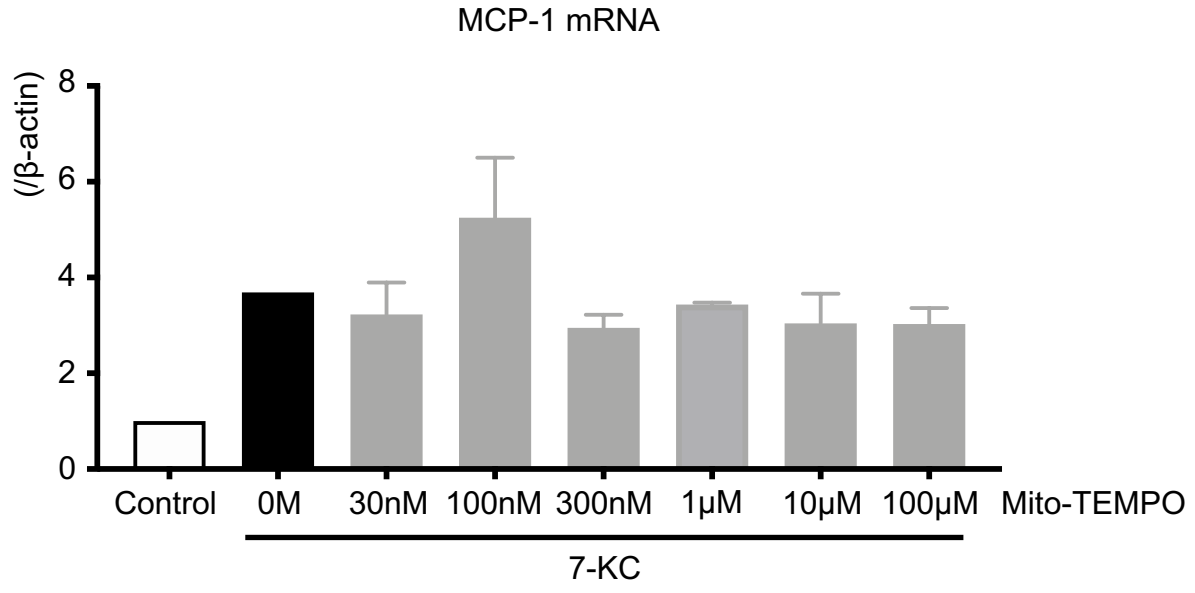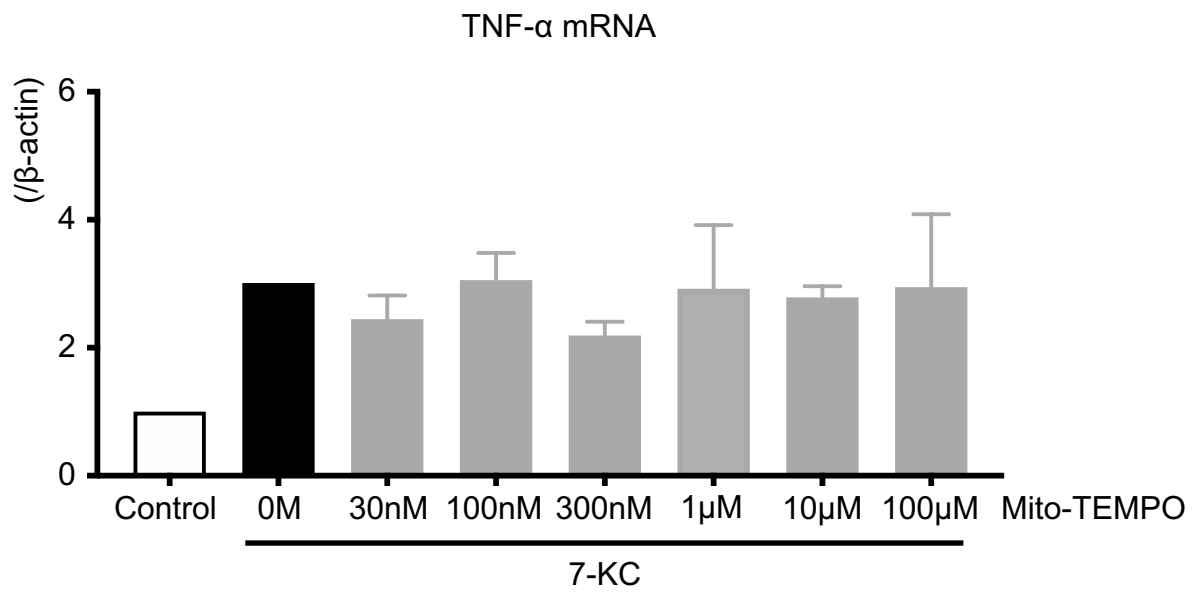

**Supplementary Figure S5. Mito-TEMPO did not suppress 7-KC-induced inflammatory gene expression.** Peritoneal macrophages were pretreated with 0 to 100 μM Mito-TEMPO for 1 hour before 10 μM 7-KC treatment for 24 hours. Expression of cytokines were quantified by RT-PCR. N=1-2. Control, vehicle control; 7-KC, 7-ketocholesterol

# Supplementary Figure S6

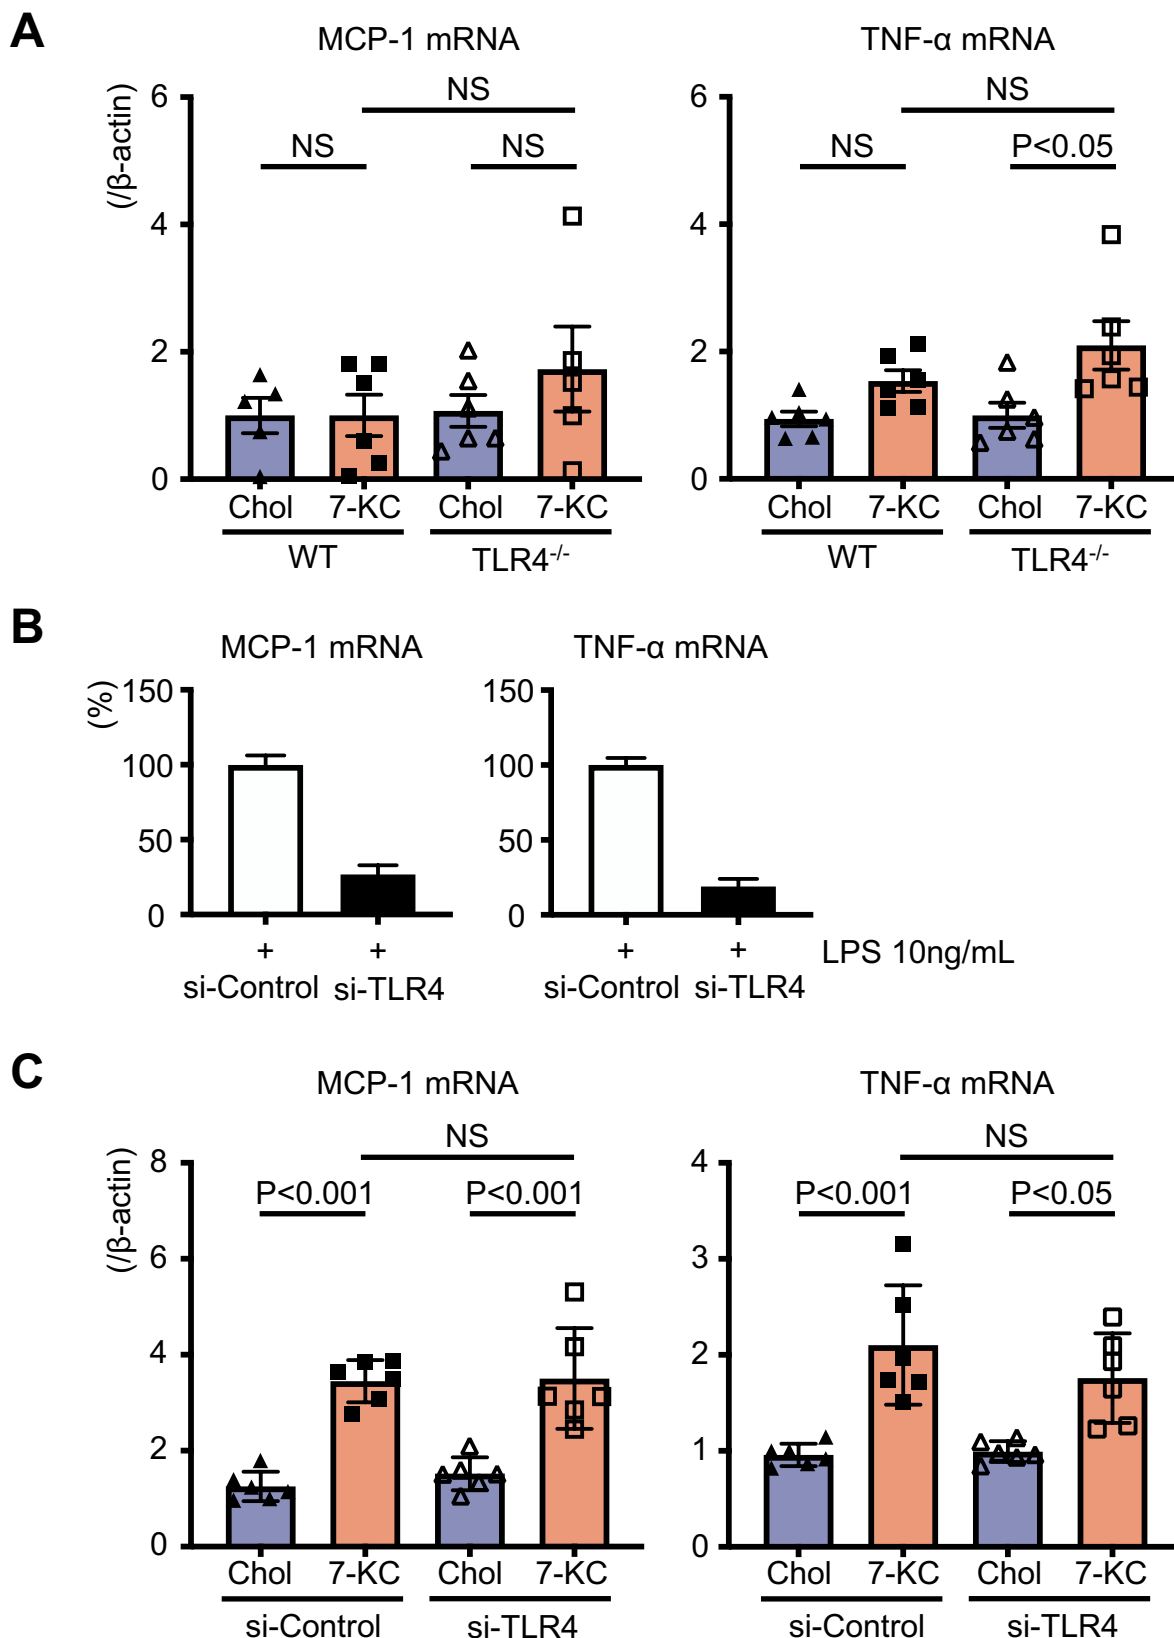

**Supplementary Figure S6. 7-KC increased inflammatory cytokines through TLR4-independent pathway.** **A**, mRNA expression of cytokines in peritoneal macrophages isolated from TLR4-deficient mice and treated with 10  $\mu$ M cholesterol or 7-KC for 24 hours. N=5-6. **B**, LPS-induced mRNA expression of cytokines in peritoneal macrophages transfected with 5 nM siRNA against TLR4 packaged in LNPs. N=2. **C**, After transfected with 5 nM siRNA against TLR4, mRNA expression of cytokines in peritoneal macrophages treated with 10  $\mu$ M cholesterol or 7-KC for 24 hours were quantified by RT-PCR. N=6. The data were analyzed by one-way ANOVA, followed by Tukey's post-hoc multiple comparison test. TLR4, toll-like receptor 4; Chol, cholesterol; 7-KC, 7-ketocholesterol; WT, wild-type mice; TLR4<sup>-/-</sup>, TLR4-deficient mice; si-Control, nontargeted control siRNA; si-TLR4, siRNA against TLR4; LPS, lipopolysaccharide; LNP, lipid nanoparticle.

# Supplementary Figure S7

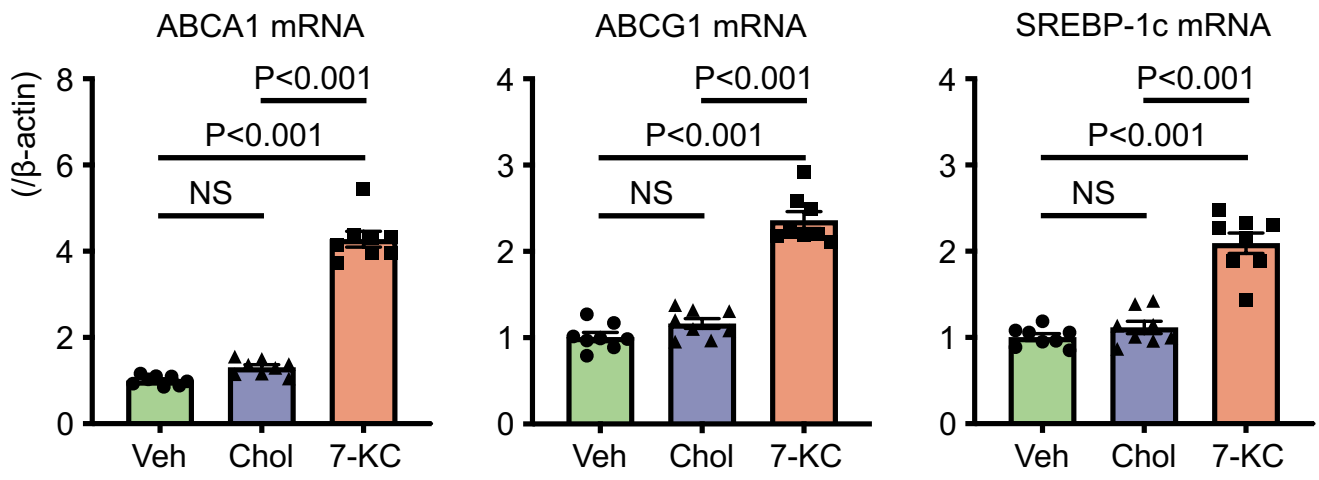

**Supplementary Figure S7. 7-KC increased LXR target genes.** mRNA expression of LXR target genes related to lipid metabolism in peritoneal macrophages treated with vehicle, 10  $\mu$ M cholesterol or 7-KC for 24 hours. N=8. The data were analyzed by one-way ANOVA, followed by Tukey's post-hoc multiple comparison test. Veh, vehicle; Chol, cholesterol; 7-KC, 7-ketocholesterol; ABCA1, ATP-binding cassette protein A1; ABCG1, ATP-binding cassette protein G1; SREBP-1c, sterol regulatory element-binding protein 1c; LXR, liver X receptor.

# Supplementary Figure S8

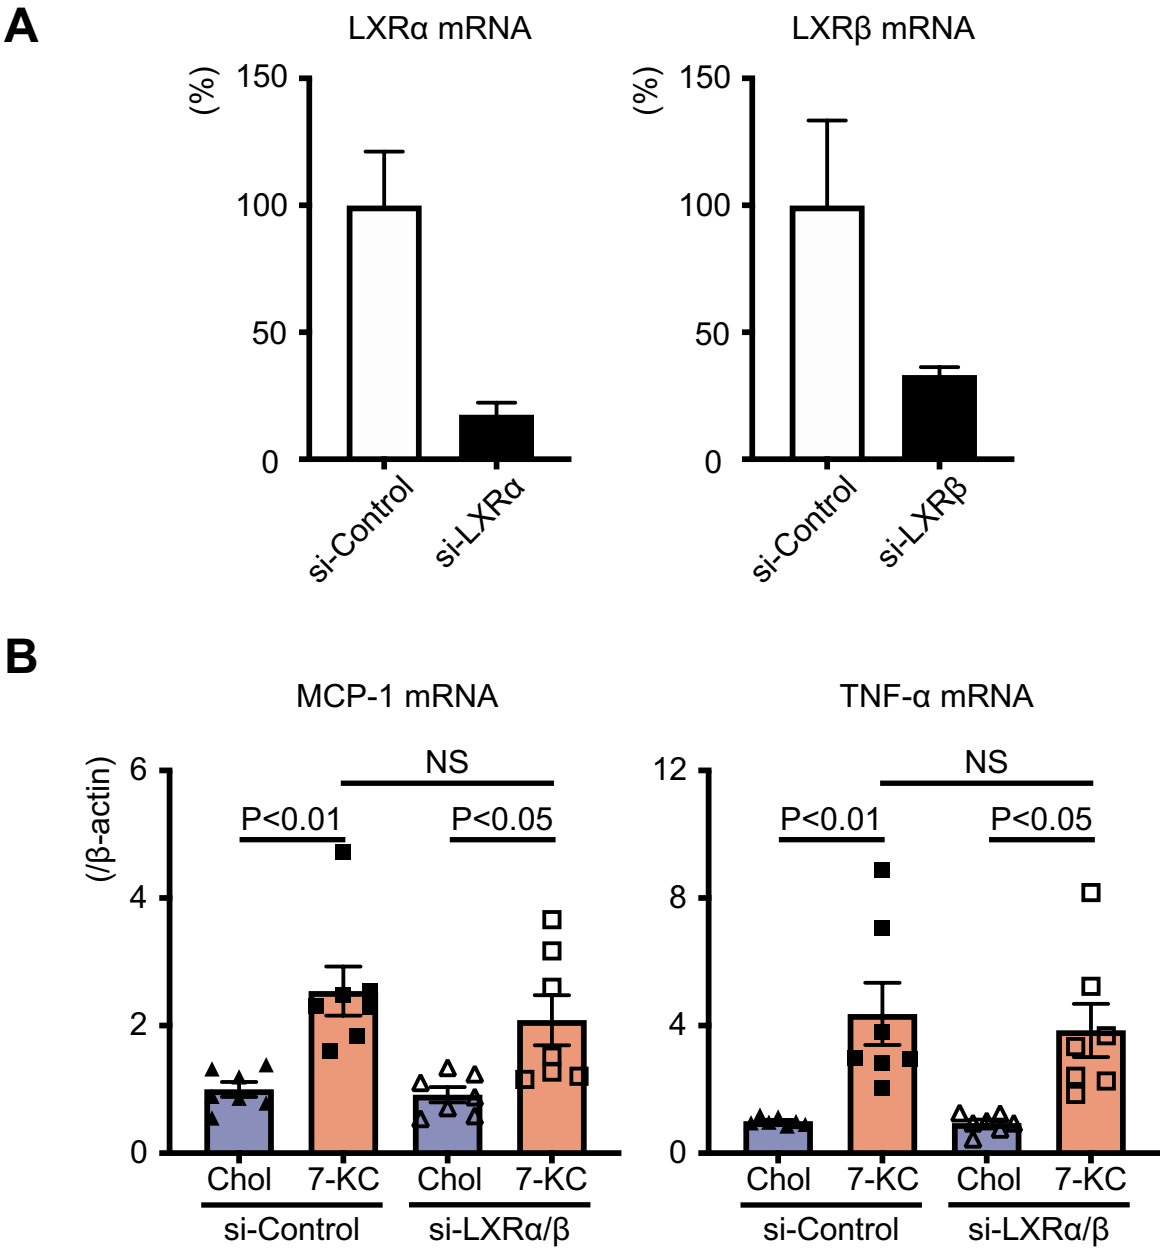

**Supplementary Figure S8. Silencing LXR did not inhibit 7-KC-induced proinflammatory cytokines.** A, Peritoneal macrophages were transfected with 10 nM siRNA against LXR $\alpha$  or LXR $\beta$  packaged in LNPs for 24 hours. Twelve hours after transfection was completed, expression of target genes were quantified by RT-PCR. N=2. B, After transfected with 10 nM siRNA against LXR $\alpha$  and LXR $\beta$ , mRNA expression of cytokines in peritoneal macrophages treated with 10  $\mu$ M cholesterol or 7-KC for 24 hours were quantified by RT-PCR. N=7. The data were analyzed by one-way ANOVA, followed by Tukey's post-hoc multiple comparison test. LXR, liver X receptor; si-Control, nontargeted control siRNA; si-LXR $\alpha$ , siRNA against LXR $\alpha$ ; si-LXR $\beta$ , siRNA against LXR $\beta$ ; si-LXR $\alpha/\beta$ , siRNA against LXR $\alpha$  and LXR  $\beta$ ; LNP, lipid nanoparticle; Chol, cholesterol; 7-KC, 7-ketocholesterol.



# Supplementary Figure S9

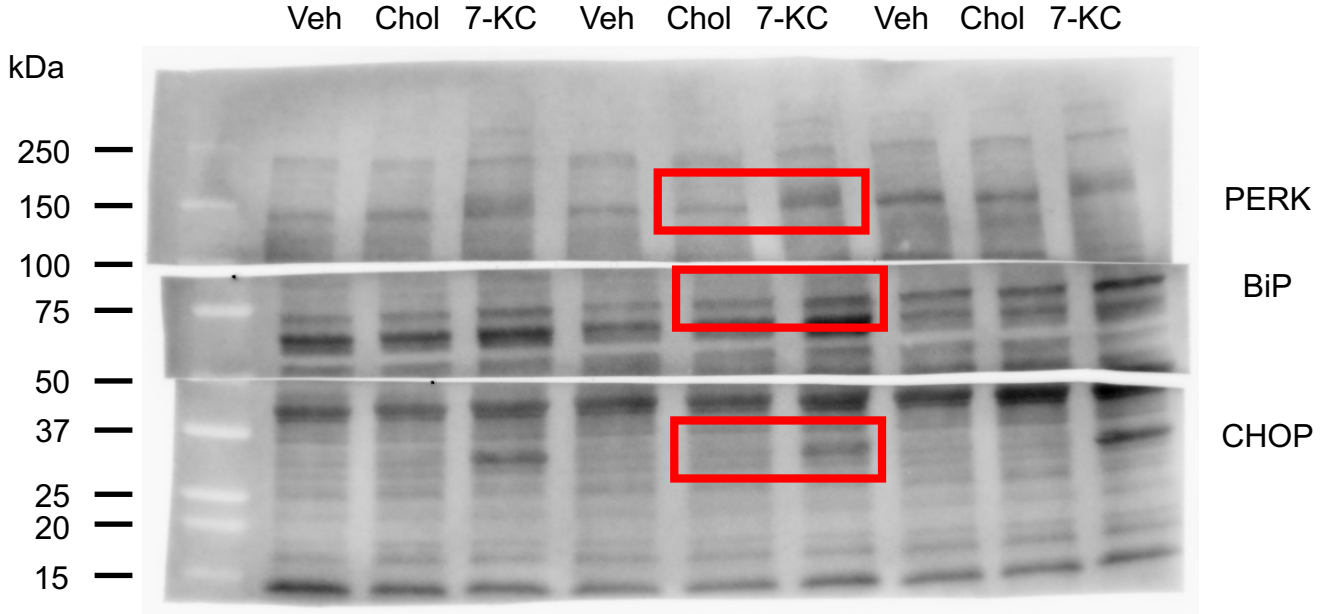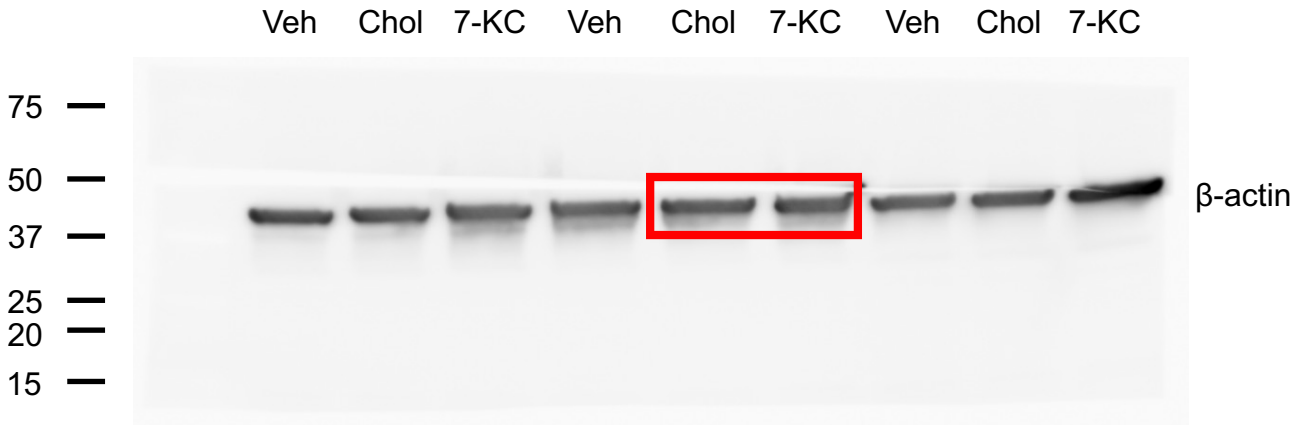

**Supplementary Figure S9. Original blots/gels of Figure 5A.** We cannot provide images of full-length blots because we cut membranes before hybridization with antibodies. Veh, vehicle; Chol, cholesterol; 7-KC, 7-ketocholesterol; PERK, PKR-like endoplasmic reticulum kinase; BiP, binding immunoglobulin protein; CHOP, C/EBP homologous protein.

# Supplementary Figure S10

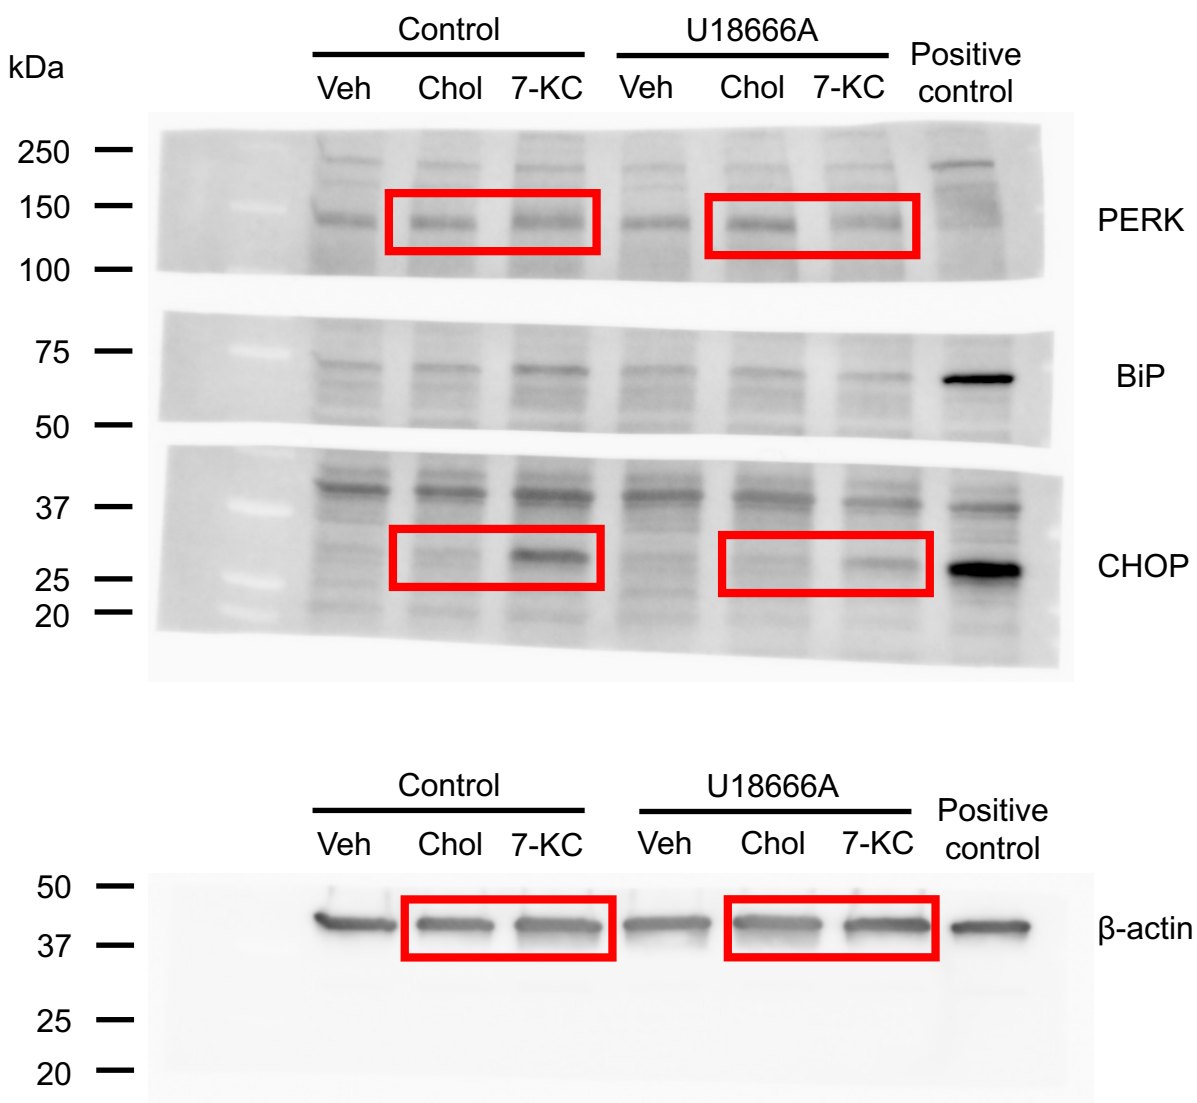

**Supplementary Figure S10. Original blots/gels of Figure 5B.** We cannot provide images of full-length blots because we cut membranes before hybridization with antibodies. Veh, vehicle; Chol, cholesterol; 7-KC, 7-ketocholesterol; PERK, PKR-like endoplasmic reticulum kinase; BiP, binding immunoglobulin protein; CHOP, C/EBP homologous protein.

# Supplementary Figure S11

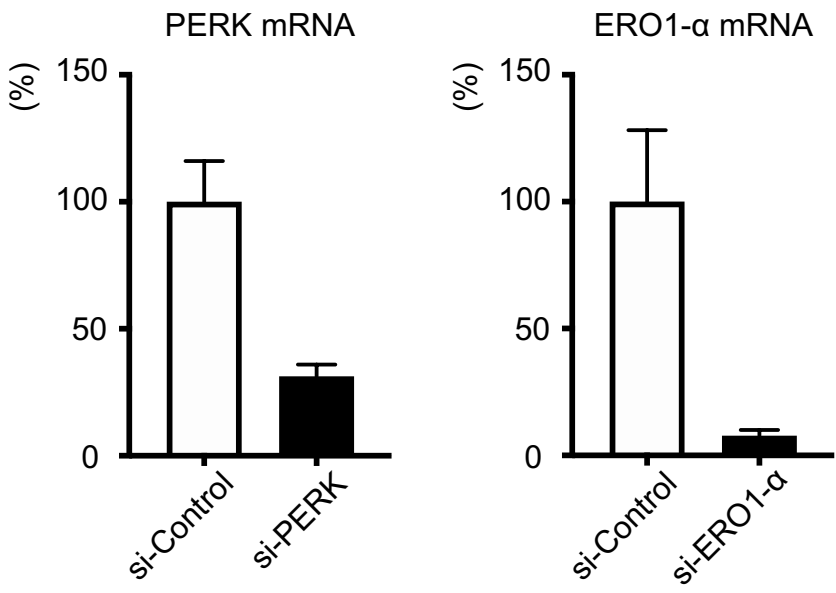

**Supplementary Figure S11. PERK and ERO1-α siRNA suppressed each target gene.** Peritoneal macrophages were transfected with 25 nM siRNA against PERK or ERO1-α packaged in LNPs for 24 hours. Twelve hours after transfection was completed, expression of target genes were quantified by RT-PCR. N=3. PERK, PKR-like endoplasmic reticulum kinase; ERO1-α, endoplasmic reticulum oxidase 1 α; si-Control, nontargeted control siRNA; si-PERK, siRNA against PERK; si-ERO1-α, siRNA against ERO1-α; LNP, lipid nanoparticle.

**Supplementary Table S1. Pathway analyses of RNA-Seq**

| <b>KEGG Pathways</b> |                                             |                          |            |
|----------------------|---------------------------------------------|--------------------------|------------|
| <b>#Term ID</b>      | <b>Term description</b>                     | <b>Count in gene set</b> | <b>FDR</b> |
| <b>mmu00100</b>      | Steroid biosynthesis                        | 9 of 19                  | 2.96E-15   |
| <b>mmu01100</b>      | Metabolic pathways                          | 17 of 1296               | 2.03E-06   |
| <b>mmu04657</b>      | IL-17 signaling pathway                     | 6 of 91                  | 9.34E-06   |
| <b>mmu05134</b>      | Legionellosis                               | 5 of 57                  | 2.02E-05   |
| <b>mmu04141</b>      | Protein processing in endoplasmic reticulum | 6 of 161                 | 0.00014    |
| <b>mmu00900</b>      | Terpenoid backbone biosynthesis             | 3 of 22                  | 0.00082    |
| <b>mmu04621</b>      | NOD-like receptor signaling pathway         | 5 of 164                 | 0.0016     |
| <b>mmu04668</b>      | TNF signaling pathway                       | 4 of 108                 | 0.0035     |
| <b>mmu04060</b>      | Cytokine-cytokine receptor interaction      | 5 of 252                 | 0.0073     |
| <b>mmu05418</b>      | Fluid shear stress and atherosclerosis      | 4 of 140                 | 0.0073     |
| <b>mmu01230</b>      | Biosynthesis of amino acids                 | 3 of 75                  | 0.0122     |
| <b>mmu04612</b>      | Antigen processing and presentation         | 3 of 78                  | 0.0126     |
| <b>mmu04064</b>      | NF-kappa B signaling pathway                | 3 of 93                  | 0.019      |
| <b>mmu00650</b>      | Butanoate metabolism                        | 2 of 27                  | 0.0223     |
| <b>mmu04931</b>      | Insulin resistance                          | 3 of 108                 | 0.0245     |
| <b>mmu05145</b>      | Toxoplasmosis                               | 3 of 107                 | 0.0245     |
| <b>mmu00250</b>      | Alanine, aspartate and glutamate metabolism | 2 of 36                  | 0.0284     |
| <b>mmu01200</b>      | Carbon metabolism                           | 3 of 118                 | 0.0284     |
| <b>mmu04380</b>      | Osteoclast differentiation                  | 3 of 122                 | 0.0284     |
| <b>mmu05020</b>      | Prion diseases                              | 2 of 34                  | 0.0284     |
| <b>mmu04210</b>      | Apoptosis                                   | 3 of 135                 | 0.0335     |
| <b>mmu05144</b>      | Malaria                                     | 2 of 45                  | 0.0375     |
| <b>mmu04010</b>      | MAPK signaling pathway                      | 4 of 292                 | 0.0412     |
| <b>mmu01212</b>      | Fatty acid metabolism                       | 2 of 51                  | 0.0435     |
| <b>mmu00280</b>      | Valine, leucine and isoleucine degradation  | 2 of 55                  | 0.0481     |
| <b>mmu05164</b>      | Influenza A                                 | 3 of 165                 | 0.0481     |

KEGG pathways were identified using the KEGG pathway database ([www.kegg.jp/kegg/kegg1.html](http://www.kegg.jp/kegg/kegg1.html)). RNA-Seq, RNA sequencing; KEGG, Kyoto Encyclopedia of Genes and Genomes; FDR, false discovery rate.

**Supplementary Table S2. qPCR primer information**

| <b>Gene</b>  | <b>Forward</b>         | <b>Reverse</b>          |
|--------------|------------------------|-------------------------|
| Mus musculus |                        |                         |
| Actb         | CCTGAGCGCAAGTACTCTGTGT | GCTGATCCACATCTGCTGGAA   |
| Il1b         | TCCAGGATGAGGACATGAGCAC | GAACGTCACACACCAGCAGGTTA |
| Il6          | TCCACGATTTCCAGAGAAC    | AGTTGCCTTCTTGGGACTGA    |
| Ccl2         | AGGTCCCTGTCATGCTTCTG   | TCTGGACCCATTCTTCTTG     |
| Tnf          | AGCCCCAGTCTGTATCCTT    | CTCCCTTTGCAGAACTCAGG    |
| Nos2         | CCCCGCTACTACTCCATCAG   | CCACTGACACTTCGCACAAA    |
| Abca1        | AACAGTTTGTGGCCCTTTTG   | AGTTCCAGGCTGGGGTACTT    |
| Abcg1        | GTACCATGACATCGCTGGTG   | AGCCGTAGATGGACAGGATG    |
| Srebf1       | GATCAAAGAGGAGCCAGTGC   | TAGATGGTGGCTGCTGAGTG    |
| Nr1h3        | CATCTTCTCTGCAGACCGGC   | TAGCATCCGTGGGAACATCA    |
| Nr1h2        | CCCAAAGTCACGCCCTGG     | CCACAATCTCTGGACCGAG     |
| Eif2ak3      | GGTCTGGTTCCTTGGTTTCA   | TTCGCTGGCTGTGTAACCTTG   |
| Ero1l        | GCCAGGTTAGTGGTACTTGG   | GGCCTCTTCAGGTTTACCTTGT  |
