# Supplementary material for: Dietary 7-ketocholesterol exacerbates myocardial ischemia–reperfusion injury in mice through monocyte/macrophage-mediated inflammation
Source: PubMed Central journal article supplement (PMC9436973; doi:10.1038/s41598-022-19065-z), 2022-09-01
Supplement: 41598_2022_19065_MOESM2_ESM.pdf [file 41598_2022_19065_MOESM2_ESM.pdf]

# Supplementary Figure S9

## Membrane 1

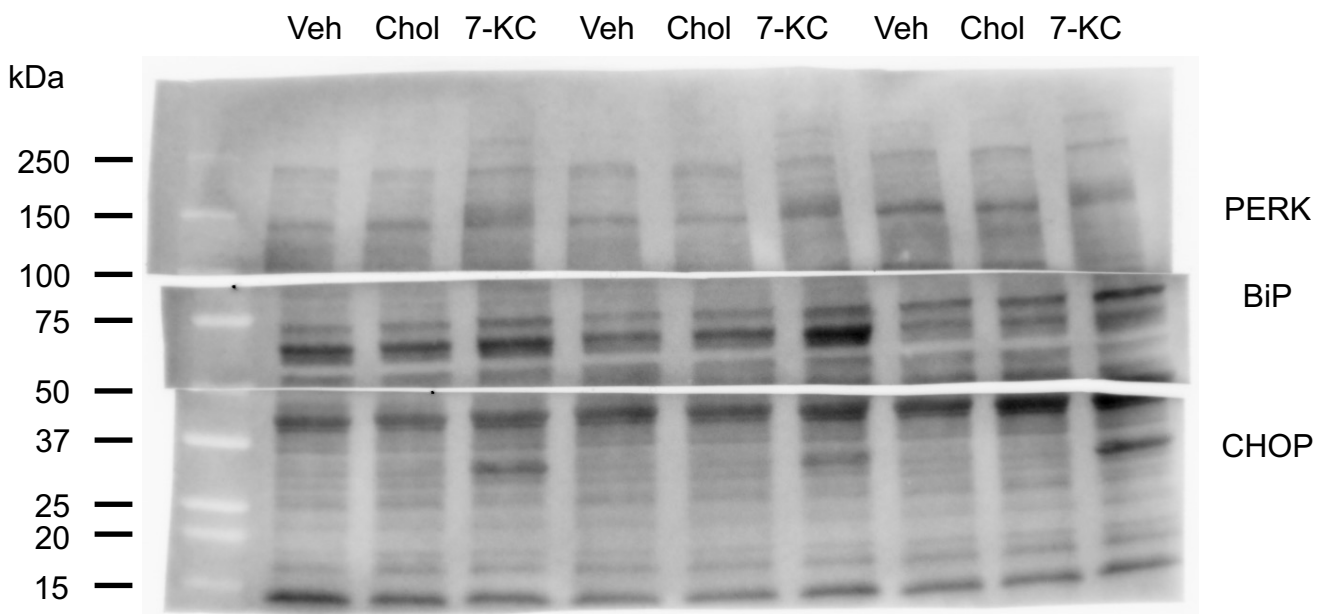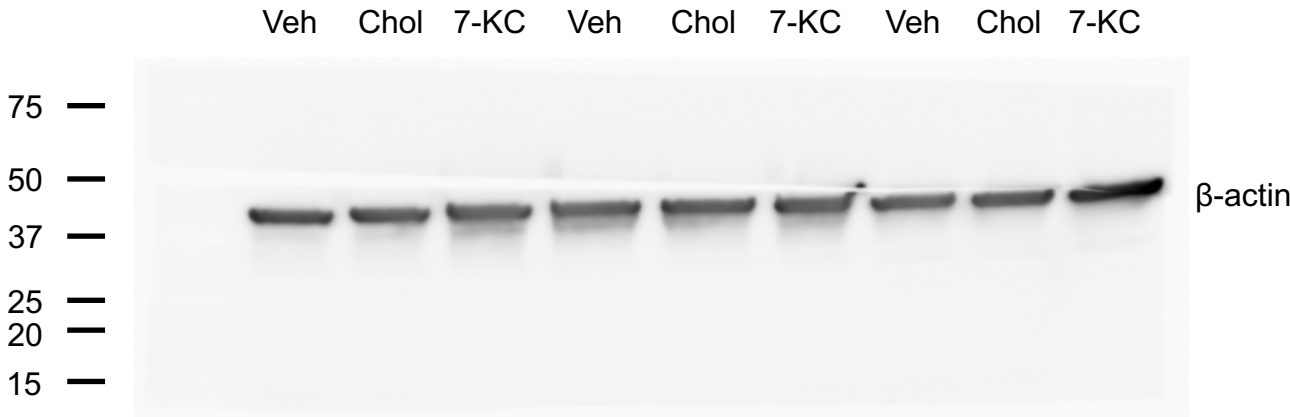

Veh, vehicle; Chol, cholesterol; 7-KC, 7-ketocholesterol; PERK, PKR-like endoplasmic reticulum kinase; BiP, binding immunoglobulin protein; CHOP, C/EBP homologous protein.

# Supplementary Figure S9

## Membrane 2

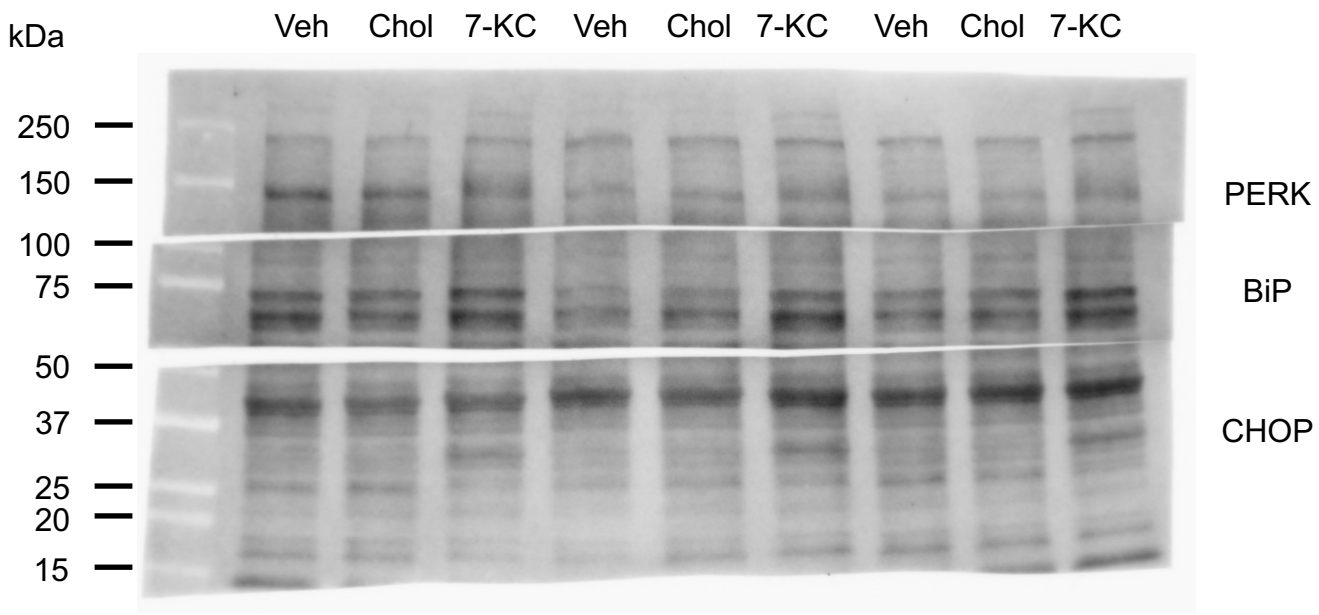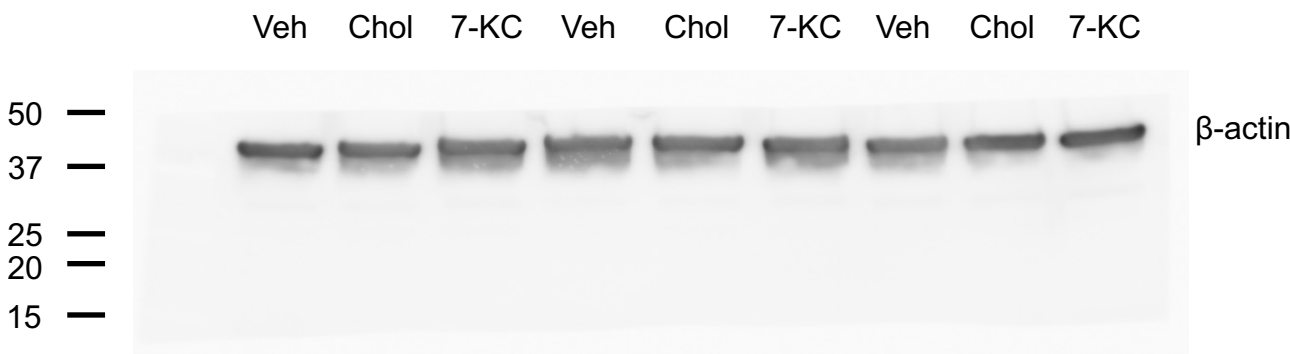

Veh, vehicle; Chol, cholesterol; 7-KC, 7-ketocholesterol; PERK, PKR-like endoplasmic reticulum kinase; BiP, binding immunoglobulin protein; CHOP, C/EBP homologous protein.

# Supplementary Figure S9

## Membrane 3

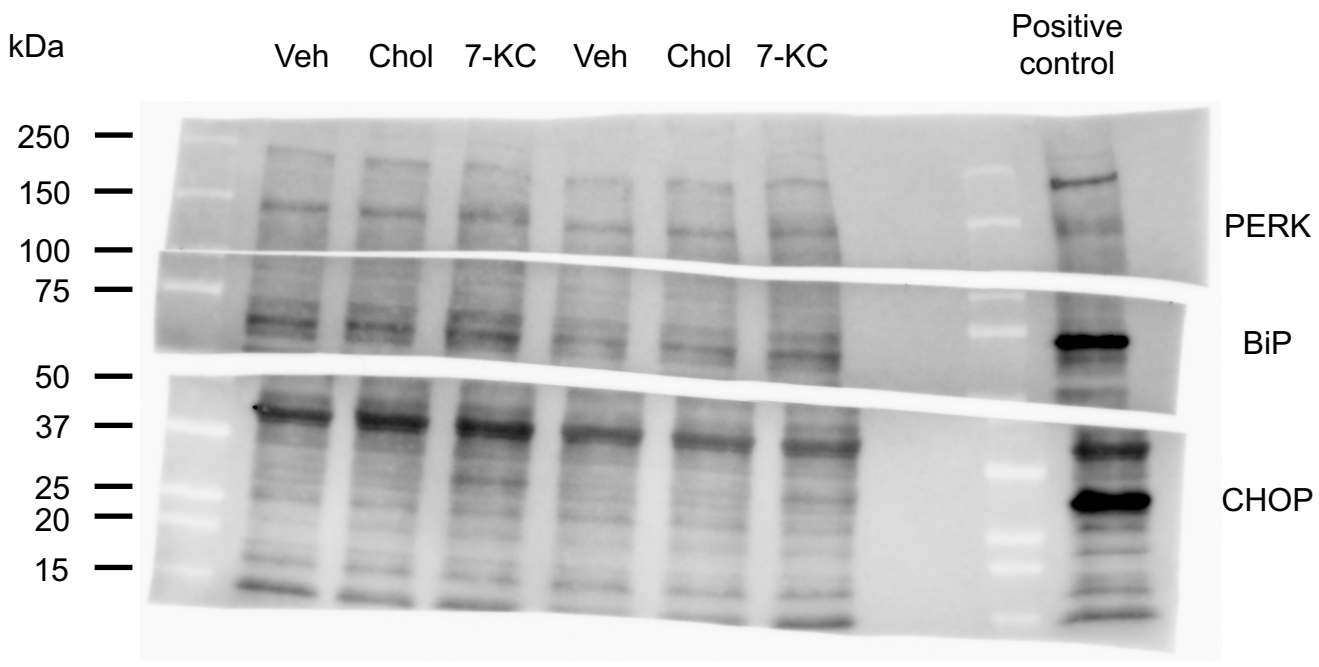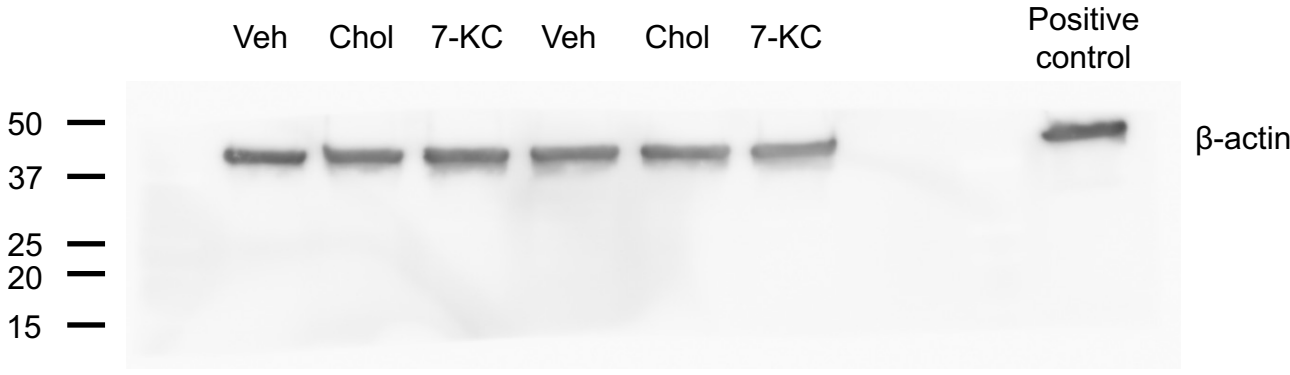

Veh, vehicle; Chol, cholesterol; 7-KC, 7-ketocholesterol; PERK, PKR-like endoplasmic reticulum kinase; BiP, binding immunoglobulin protein; CHOP, C/EBP homologous protein.
